# Supplementary material for: Carbonates stabilize interstratified α/β intermediates in the preparation of nickel hydroxide
Source: Springer Nature journal article supplement (doi:10.1007/s10853-025-10735-7), 2025-03-01
Supplement: MOESM1 [file 10853_2025_10735_MOESM1_ESM.pdf]

## Supplementary information

### Carbonates stabilize interstratified $\alpha/\beta$ intermediates in the preparation of nickel hydroxide

P. H. Ho<sup>1,2</sup>, I. Z. Awan<sup>1,3,4</sup>, N. Tanchoux<sup>1</sup>, R. Arletti<sup>5</sup>, S. Albonetti<sup>3,6</sup>, F. Cavani<sup>3,6</sup>, A. Martucci<sup>7</sup>, H. Petitjean<sup>1</sup>, D. Tichit<sup>1</sup>, P. Benito<sup>3,6</sup>, F. Di Renzo<sup>1,\*</sup>

<sup>1</sup> ICGM, Université de Montpellier-CNRS-ENSCM, Montpellier, France

<sup>2</sup> Institute for Sustainable Hydrogen Economy, Forschungszentrum Jülich, Am Brainenergy Park 4, 52428, Jülich, Germany

<sup>3</sup> Dpt. Industrial Chemistry "Toso Montanari", Alma Mater Studiorum Università di Bologna, Bologna, Italy

<sup>4</sup> Dpt. Chemistry, Lahore Garrison University, Lahore, Pakistan

<sup>5</sup> Dpt. Chemical and Geological Sciences, University of Modena and Reggio Emilia, Modena, Italy

<sup>6</sup> C<sup>3</sup> Center for Chemical Catalysis, Alma Mater Studiorum Università di Bologna, Bologna, Italy

<sup>7</sup> Dpt. Physics and Earth Sciences, University of Ferrara, Ferrara, Italy

\*francesco.di-renzo@umontpellier.fr

|                                                                                                                                                                                                                                                                                              |      |
|----------------------------------------------------------------------------------------------------------------------------------------------------------------------------------------------------------------------------------------------------------------------------------------------|------|
| Table S1. Synthesis conditions. Nature of the precipitation solutions, composition of the aging system, temperature of aging and drying, phases formed.                                                                                                                                      | p. 2 |
| Table S2. Results of nitrogen and carbon analysis and thermogravimetry                                                                                                                                                                                                                       | p. 2 |
| Interpretation of the XRD pattern of interstratified Ni(OH) <sub>2</sub>                                                                                                                                                                                                                     | p. 3 |
| Figure S1. XRD pattern of mixed-layered $\alpha/\beta$ -Ni(OH) <sub>2</sub> , composition Ni(OH) <sub>1.66</sub> (NO <sub>3</sub> ) <sub>0.2</sub> (CO <sub>3</sub> ) <sub>0.16</sub> ·0.37 H <sub>2</sub> O, R0, 38 % $\beta$ , and the location of the reflections for pure parent phases. | p. 4 |
| Figure S2. TG (A) and DTG (B) traces of $\alpha$ -Ni(OH) <sub>2</sub> samples N25-C14-W55 (a), N02-C21-W78 (b), N01-C31-W109 (c), N00-C40-W129 (d), N14-C15-W126 (e).                                                                                                                        | p. 5 |
| Figure S3. TG (A) and DTG (B) traces of IS-Ni(OH) <sub>2</sub> samples N02-C14-W28 (a), N19-C05-W21 (b), N02-C16-W37 (c), N06-C16-W48 (d), N13-C06-W36 (e).                                                                                                                                  | p.5  |
| Figure S4. TG and DTG traces of $\beta$ -Ni(OH) <sub>2</sub> N02-C03-W06 (a), N01-C02-W26 (b).                                                                                                                                                                                               | P. 6 |

Tab. S1. Synthesis conditions. Nature of the precipitation solutions, composition of the aging system, temperature of aging and drying, phases formed.

| sample       | receiving bath                        | pH control | Aging system (mol L <sup>-1</sup> ) |                 |                 | aging | drying | phase               |
|--------------|---------------------------------------|------------|-------------------------------------|-----------------|-----------------|-------|--------|---------------------|
|              |                                       |            | Ni                                  | NO <sub>3</sub> | CO <sub>3</sub> | T /°C | T/°C   | Ni(OH) <sub>2</sub> |
| N14-C15-W126 | 2M NaOH                               | 3M NaOH    | 0.34                                | 0.67            | 0.05            | 25    | 25     | α                   |
| N25-C14-W55  | 2M NaOH                               | 3M NaOH    | 0.34                                | 0.67            | 0.05            | 25    | 80     | α                   |
| N02-C03-W06  | 2M NaOH                               | 3M NaOH    | 0.34                                | 0.67            | 0.01            | 80    | 80     | β                   |
| N13-C06-W36  | 2M NaOH                               | 3M NaOH    | 0.19                                | 0.38            | 0.01            | 25    | 25     | IS+β                |
| N19-C05-W21  | 2M NaOH                               | 3M NaOH    | 0.19                                | 0.38            | 0.01            | 25    | 80     | IS+β                |
| N01-C02-W06  | 2M NaOH                               | 3M NaOH    | 0.19                                | 0.38            | 0.00            | 80    | 80     | β                   |
| N01-C31-W109 | 0.1M Na <sub>2</sub> CO <sub>3</sub>  | 0.5M NaOH  | 0.19                                | 0.38            | 0.06            | 25    | 25     | α                   |
| N02-C21-W78  | 0.1M Na <sub>2</sub> CO <sub>3</sub>  | 0.5M NaOH  | 0.19                                | 0.38            | 0.04            | 25    | 80     | α                   |
| N06-C16-W48  | 0.1M Na <sub>2</sub> CO <sub>3</sub>  | 0.5M NaOH  | 0.19                                | 0.38            | 0.03            | 80    | 80     | IS                  |
| N02-C14-W28  | 0.25M Na <sub>2</sub> CO <sub>3</sub> | 2M NaOH    | 0.31                                | 0.63            | 0.12            | 80    | 80     | IS                  |
| N00-C40-W129 | 0.25M Na <sub>2</sub> CO <sub>3</sub> | 3M NaOH    | 0.34                                | 0.67            | 0.13            | 25    | 25     | α                   |
| N02-C16-W37  | 0.25M Na <sub>2</sub> CO <sub>3</sub> | 3M NaOH    | 0.34                                | 0.67            | 0.13            | 80    | 80     | IS                  |

Samples denomination by composition: percent molar ratios NO<sub>3</sub>/Ni (N), CO<sub>3</sub>/Ni (C) and interlayer water/Ni (W)

Table S2. Results of nitrogen and carbon analysis and thermogravimetry

| sample       | Flash C-N analysis |      |      | TG data               |                      |
|--------------|--------------------|------|------|-----------------------|----------------------|
|              | N%                 | C%   | H%   | mass loss %<br>200° C | mass loss %<br>final |
| N14-C15-W126 | 1.79               | 1.61 | 2.35 | 20.7                  | 43.3                 |
| N25-C14-W55  | 3.08               | 1.52 | 2.28 | 9.7                   | 35.1                 |
| N02-C03-W06  | 0.31               | 0.37 | 2.22 | 1.1                   | 21.6                 |
| N13-C06-W36  | 1.75               | 0.76 | 2.02 | 6.4                   | 30.8                 |
| N19-C05-W21  | 2.64               | 0.63 | 1.97 | 3.5                   | 28.3                 |
| N01-C02-W06  | 0.20               | 0.28 | 2.16 | 1.1                   | 21.2                 |
| N01-C31-W109 | 0.16               | 3.24 | 2.48 | 17.1                  | 39.0                 |
| N02-C21-W78  | 0.25               | 2.30 | 2.56 | 12.8                  | 35.4                 |
| N06-C16-W48  | 0.80               | 1.90 | 2.10 | 8.4                   | 29.9                 |
| N02-C14-W28  | 0.31               | 1.66 | 2.03 | 3.8                   | 25.0                 |
| N00-C40-W129 | 0.00               | 3.80 | 2.94 | 18.3                  | 41.0                 |
| N02-C16-W37  | 0.20               | 1.85 | 2.40 | 6.3                   | 28.0                 |

## Interpretation of the XRD pattern of interstratified Ni(OH)<sub>2</sub>

The study of the diffraction pattern of mixed layered materials has been early developed in the field of clays, where several phases with compatible structure in the *ab* plane can frequently be formed together. The xrd pattern of the mixed material strongly depends on the type and ordering of the layer stacking. In the case of a physical mixture, *viz.* the superposition of oriented individual crystallite of two different phases, the pattern will essentially correspond to the addition of the patterns of the two phases. In the case of the regular alternation of layers of two phases (degree of ordering  $R = 1$ ), a superstructure will be formed, with 001 spacing corresponding to the sum of the 001 spacings of the two phases. Additional reflections will be formed, defined as rational, as their spacings obey the Bragg law.

In the case in which layers of two phases are randomly superposed ( $R = 0$ ), still maintaining common parallel boundaries and good alignment in the 001 direction, the X-rays waves from the components interfere with each other and a composite pattern is produced, which differs from a physical mixture and does not form an ordered superstructure. If the stacking sequences are not periodic, the composite reflections do not follow the Bragg law and are defined as irrational. Methods to calculate the pattern profiles in these cases have been developed, as a function of the degree of order and of the position of the atoms in each layer, and information on appropriate methods and programs is available in the literature cited at the bottom of this section. Their application to IS-Ni(OH)<sub>2</sub>, formed by interstratification of  $\alpha$ - and  $\beta$ -Ni(OH)<sub>2</sub>, is complicated by uncertainties about the degree of hydration and the position of anions in the  $\alpha$ -Ni(OH)<sub>2</sub> phase.

However, The position of the compromise reflection, which results from the interference of the patterns of the alpha and beta phases, can be calculated just from the position of the reflections of the parent phases and their ratio, as shown by Méring in 1949. In the general case of the random interstratification of A and B phases, the position of the compromise reflection will be

$$1) \quad d_{ave} = x d_A + (1-x) d_B$$

Where  $x = A / (A+B)$  is the relative amount of the phases. In the case of IS-Ni(OH)<sub>2</sub>, we have two compromise reflections, resulting from the interference of  $d(001)$  of  $\beta$ -Ni(OH)<sub>2</sub> with, respectively,  $d(001)$  and  $d(002)$  of  $\alpha$ -Ni(OH)<sub>2</sub> (see Fig. S1). The labelling of the resulting reflections, as systematised by Bailey, indicates the component contributions separated by a slash, with the smaller spacing first. So, we have to define two composite reflections,  $001(\beta\text{-Ni(OH)}_2)/001(\alpha\text{-Ni(OH)}_2)$  and  $002(\alpha\text{-Ni(OH)}_2)/001(\beta\text{-Ni(OH)}_2)$  and we have to write twice the equation (1) as

$$2) \quad d_{001/001} = x d_{\alpha 001} + (1-x) d_{\beta 001}$$

$$3) \quad d_{002/001} = x d_{\beta 001} + (1-x) d_{\alpha 002}$$

We have no a priori knowledge of the hydration level and the cell parameter of  $\alpha$ -Ni(OH)<sub>2</sub> but we know  $d(001)$  of  $\beta$ -Ni(OH)<sub>2</sub> and the position of the compromise reflections. We can write the ratio between  $d(001)$  and  $d(002)$  of  $\alpha$ -Ni(OH)<sub>2</sub> as

$$4) \quad d_{\alpha 001} = 2 d_{\alpha 002}$$

The solution of the system of the three equations (2), (3), and (4) provides us with the values of the three unknowns  $d_{\alpha 001}$ ,  $d_{\alpha 002}$ , and  $x$ , *viz.* the interlayer spacing of  $\alpha$ -Ni(OH)<sub>2</sub> and the fraction of its amount in the interstratified material.

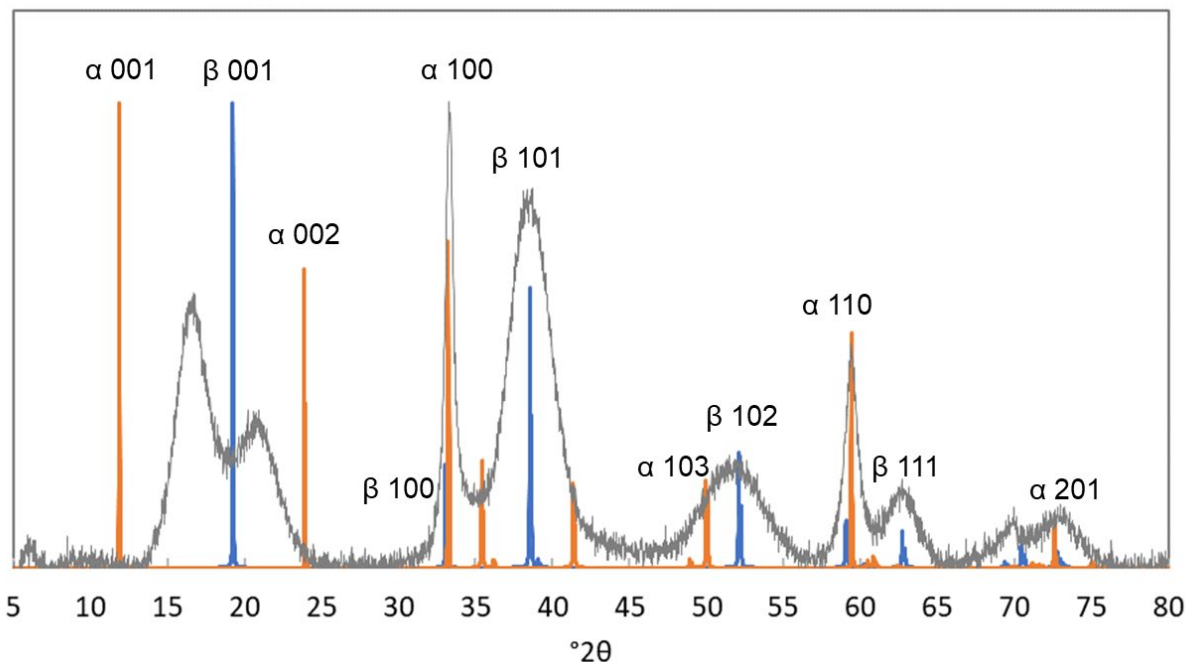

Fig. S1. XRD pattern of mixed-layered  $\alpha/\beta$ -Ni(OH)<sub>2</sub>, Ni(OH)<sub>1.66</sub>(NO<sub>3</sub>)<sub>0.2</sub>(CO<sub>3</sub>)<sub>0.16</sub>·0.37 H<sub>2</sub>O, R0, 38 %  $\alpha$ , and the locations of the reflections for pure parent phases.

### Useful literature:

- Bailey SW (1982) Nomenclature for Regular Interstratification. *Clay Mineral* 17:243-248. doi: 10.1180/claymin.1982.017.2.09
- Guggenheim S (2011) An Overview of Order/Disorder in Hydrated Phyllosilicates. In Brigatti MF, Mottana A (eds) *Layered Mineral Structures and their Application in Advanced Technologies*. European Mineralogical Union, Twickenham, pp 73-122. doi: 10.1180/EMU-notes.11.2
- Méring J (1949) L'Interférence des Rayons X dans les Systèmes à Stratification Désordonnée. *Acta Cryst* 2:371-377. doi.org/10.1107/S0365110X49000977
- Moore D, Reynolds RC (1989) *X-Ray Diffraction and Identification and Analysis of Clay Minerals*. Oxford University Press, Oxford. ISBN 0-19-505170-X
- Reynolds RC (1980) Interstratified Clay Minerals. In: Brindley GW, Brown G (eds) *Crystal structures of clay minerals and their X-ray identification*. Mineralogical Society, London, pp 249-304. doi: 10.1180/mono-5.4
- Yuan H, Bish DL (2019) Improved Matrix Methodology for Calculating Diffraction Intensity Profiles from Interstratified Phyllosilicates. *Clay Clay Miner* 67:399-409. doi: 10.1007/s42860-019-00034-z

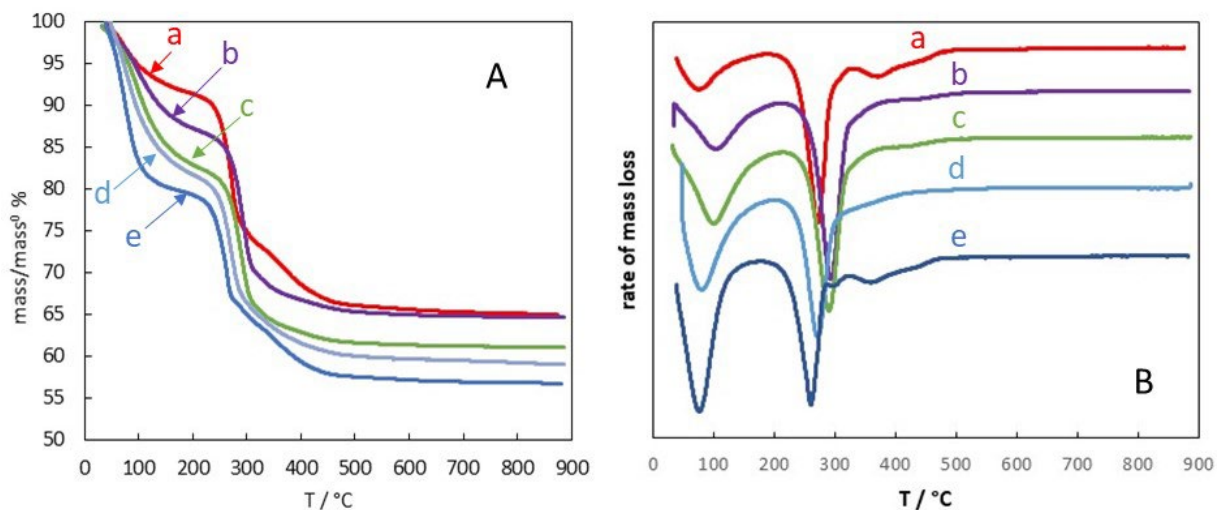

Fig. S2. TG (A) and DTG (B) traces of  $\alpha$ -Ni(OH)<sub>2</sub> samples N25-C14-W55 (a), N02-C21-W78 (b), N01-C31-W109 (c), N00-C40-W129 (d), N14-C15-W126 (e).

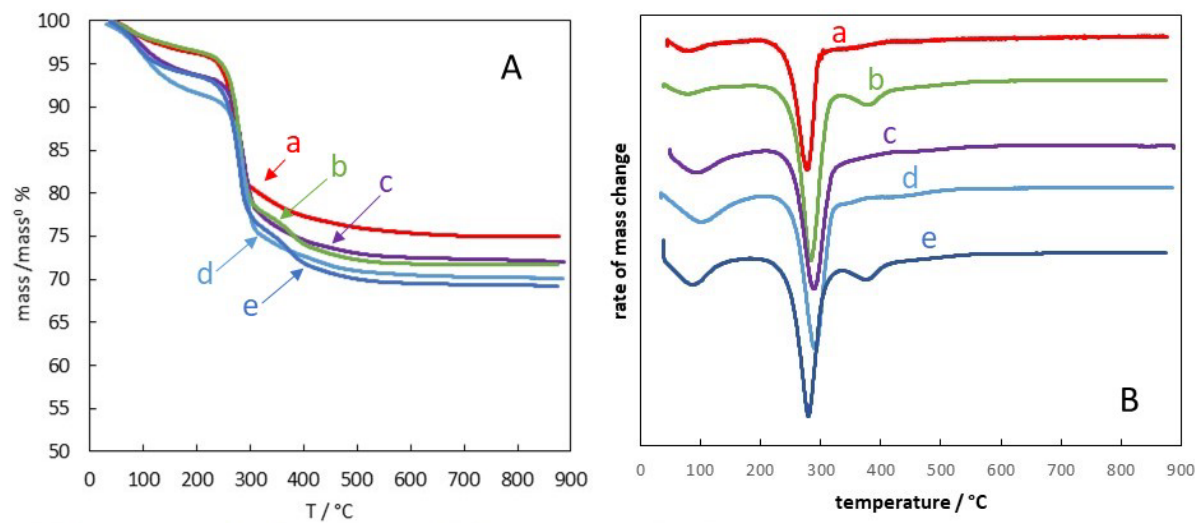

Fig. S3. TG (A) and DTG (B) traces of IS-Ni(OH)<sub>2</sub> samples N02-C14-W28 (a), N19-C05-W21 (b), N02-C16-W37 (c), N06-C16-W48 (d), N13-C06-W36 (e).

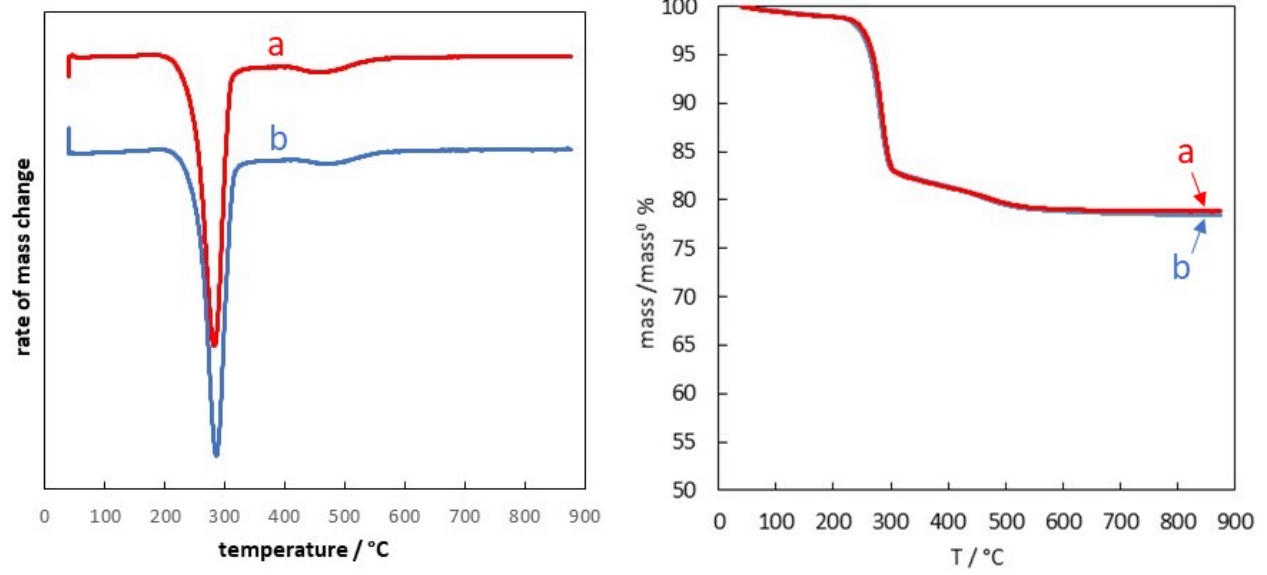

Fig. S4. TG and DTG traces of  $\beta$ -Ni(OH)<sub>2</sub> N02-C03-W06 (a), N01-C02-W26 (b).
